# Supplementary material
Source: Springer Nature journal article supplement (https://www.springermedizin.de/resource/supplementary/13063_2013_2023_MOESM5_ESM.pdf/9621172)
Supplement: MOESM5 [file 9621172]

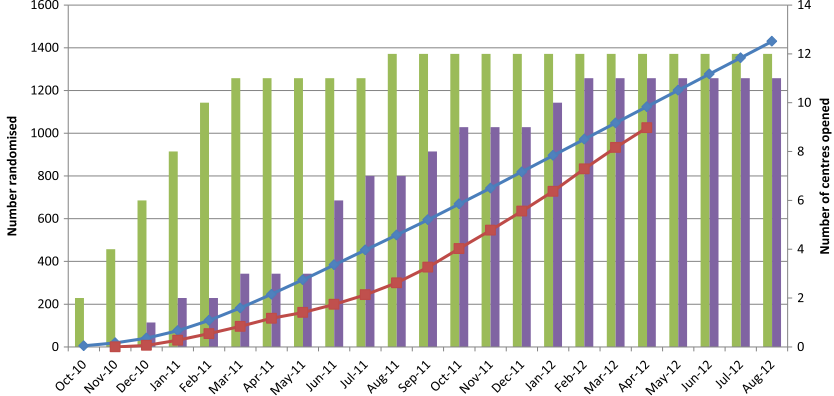

|                  | Oct-10 | Nov-10 | Dec-10 | Jan-11 | Feb-11 | Mar-11 | Apr-11 | May-11 | Jun-11 | Jul-11 | Aug-11 | Sep-11 | Oct-11 | Nov-11 | Dec-11 | Jan-12 | Feb-12 | Mar-12 | Apr-12 | May-12 | Jun-12 | Jul-12 | Aug-12 |
|------------------|--------|--------|--------|--------|--------|--------|--------|--------|--------|--------|--------|--------|--------|--------|--------|--------|--------|--------|--------|--------|--------|--------|--------|
| Centres expected | 2      | 4      | 6      | 8      | 10     | 11     | 11     | 11     | 11     | 11     | 12     | 12     | 12     | 12     | 12     | 12     | 12     | 12     | 12     | 12     | 12     | 12     | 12     |
| Centres opened   | 0      | 0      | 1      | 2      | 2      | 3      | 3      | 3      | 6      | 7      | 7      | 8      | 9      | 9      | 9      | 10     | 11     | 11     | 11     | 11     | 11     | 11     | 11     |
| Expected         | 5      | 19     | 41     | 76     | 124    | 182    | 246    | 314    | 384    | 454    | 523    | 595    | 669    | 743    | 819    | 896    | 972    | 1048   | 1124   | 1201   | 1277   | 1353   | 1430   |
| Actual           |        | 0      | 7      | 31     | 62     | 96     | 134    | 161    | 199    | 244    | 300    | 373    | 460    | 546    | 635    | 728    | 833    | 933    | 1026   |        |        |        |        |
